# Supplementary material
Source: Royal Society of Chemistry journal article supplement (doi:10.1039/d6fo00493h)
Supplement: d6fo00493h1.xlsx [file d6fo00493h1.xlsx]

## Sheet: DETECTION
		Number	RT [min]	Family	Name	Molecular Formula	M meas.	m/z meas.	mSigma	Δm/z [mDa]	MS/MS score	Ions	HBB-F	HBB-F	HBB-F	HBB-F	HBB-F	HBB-F	HBB	HBB	HBB	HBB	HBB	HBB	HBB-H	HBB-H	HBB-H	HBB-H	HBB-H	HBB-H
		1	2.25	Amino acid	Aspartic acid	C4H7NO4	133.036	132.028	5.2	1.806	976.4	[M-H]-	3276	3312	2720	2926	3044	3130	5660	6006	5950	5756	7176	6038	7322	8046	6956	7002	8154	6732
		2	1.72	Amino acid	Glutamic acid	C5H9NO4	147.051	146.044	5.9	1.907	883.567	[M-H]-	0	0	0	0	0	0	4646	4662	4164	4340	4460	4664	4734	9158	4980	4550	4120	9278
		3	1.17	Amino acid	L-Arginine	C6H14N4O2	174.11	173.103	7.5	1.59	995.2	[M-H]-	0	0	0	0	0	0	0	0	0	0	0	0	0	0	0	0	0	0
		4	3.78	Amino acid	L-Phenylalanine	C9H11NO2	165.078	164.07	7	1.611	831	[M-H]-, [M+Cl]-	0	0	0	0	0	0	0	0	0	0	0	0	0	0	0	0	0	0
		5	1.39	Amino acid	L-Serine	C3H7NO3	105.041	104.034	6.3	1.689	984.2	[M-H]-	0	0	0	0	0	0	0	0	0	0	0	0	0	0	0	0	0	0
		6	1.42	Amino acid	Threonine	C4H9NO3	119.057	118.049	8.6	1.695	996.1	[M-H]-	0	0	0	0	0	0	0	0	0	0	0	0	0	0	0	0	0	0
		7	4.84	Amino acid	Tryptophan	C11H12N2O2	204.089	203.081	8.1	1.176	944	[M-H]-, [M+Cl]-	0	0	0	0	0	0	1364	1536	1448	1750	0	1550	1832	1896	2056	1588	1704	1846
		8	8.13	Amino acid	Pyroglutamyl-Isoleucine	C11H18N2O4	242.126	241.118	2.8	0.93	786.8	[M-H]-, [M+Cl]-	0	0	0	1008	0	0	0	0	0	0	0	0	0	0	0	0	0	0
		9	3	Amino acid	Pyroglutamate	C5H7NO3	129.041	128.034	4.5	1.814	-	[M-H]-	28308	28978	28180	29484	28152	29932	10904	8722	9298	9142	10138	9694	11568	11922	12786	11146	10938	10788
		10	1.7	Amino acid	Pyroglutamic acid	C5H7NO3	129.04	128.033	5	2.41	-	[M-H]-	0	0	0	0	0	0	0	0	0	0	0	0	0	0	0	0	0	0
		11	1.32	Amino acid	beta-Cyano-alanine	C4H6N2O2	114.041	113.033	4.3	2.202	954.1	[M-H]-	0	0	0	0	0	0	1848	2014	2140	1812	2034	1844	1854	1690	1870	1526	1966	1618
		12	3.01	Carbohydrate	Sucrose	C12H22O11	342.116	341.108	19.5	0.571	-	[M-H]-	11670	11896	11312	11986	11920	12062	0	0	0	0	0	0	0	0	0	0	0	0
		13	1.5	Carbohydrate	Sucrose lactose	C24H44O22	684.23	683.223	5.53333	2.04233	-	[M-H]-	168820	164688	160450	168044	176708	175440	66132	65100	69068	68202	71066	71034	74640	75202	69570	69404	69998	71092
		14	1.46	Carbohydrate	Trehalose	C12H22O11	342.116	341.109	3	0.174	-	[M-H]-	119082	119078	114308	122452	121880	122810	35008	35224	34574	37580	35930	37936	36174	37966	37450	36120	35024	36828
		15	1.96	Carbohydrate	Lactoyl-disaccharide	C34H46O20	774.258	773.251	28.9	0.364	-	[M-H]-	92182	94218	95616	98186	97290	96720	0	0	0	0	0	0	0	0	0	0	0	0
		16	1.74	Carbohydrate	Lactoyl-disaccharide Derivative	C15H28O14	432.148	431.14	9.6	0.3805	-	[M-H]-	315844	308024	289360	319058	0	321314	33642	31892	29418	27502	28706	27218	27034	26014	24344	23948	24058	22574
		17	2.24	Carbohydrate	Glc-hydroxyheptanoic acid	C13H24O13	388.121	387.114	5.2	0.286	-	[M-H]-	330162	321890	308600	326814	327260	331808	101604	95176	96544	98006	97740	99552	103722	103886	104920	103896	103118	105158
		18	2.97	Carbohydrate	N-Fructosyl pyroglutamate	C11H17NO8	291.095	290.088	14	0.289	805.1	[M-H]-	0	0	0	0	0	1044	0	0	0	0	0	0	0	0	0	0	0	0
		19	1.56	Carbohydrate	Melezitose	C18H32O16	504.169	503.162	33.2	0.033	764.8	[M-H]-	0	0	0	0	0	0	1336	1602	1542	1674	1188	1420	1278	1288	1450	1152	1148	1148
		20	1.38	Carbohydrate	Stachyose	C24H42O21	666.223	665.216	12.3	1.223	798.7	[M-H]-	0	0	0	0	0	0	0	0	0	0	0	0	1708	0	0	0	1298	0
		21	3.745	Carbohydrate	Galactose-1P	C6H13O9P	260.029	259.021	12.5	1.026	995.9	[M-H]-	12224	11800	11090	11944	12332	11560	0	0	0	0	0	0	0	0	0	0	0	0
		22	3.69	Carbohydrate	Trehalose-6-Phosphate	C12H23O14P	422.083	421.076	26.1	0.761	975.9	[M-H]-	9324	9378	9052	9110	9124	9020	1278	0	1250	1306	1196	1262	1646	1656	1502	1708	1604	1642
		23	3.36	Carbohydrate	Deoxyribose	C5H10O4	134.053	133.046	4.5	4.831	917	[M-H]-	0	0	0	0	0	0	0	0	0	0	0	0	0	0	0	0	0	0
		24	1.37	Carbohydrate	Glucose	C6H12O6	198.072	179.054	8.27	1.6191	-	[M-H-H2O]-, [M-H]-	0	0	0	0	0	0	5474	5088	6314	4950	4944	4978	5784	5260	6002	5008	4952	5440
		25	1.38	Carbohydrate	L-Erythrulose	C4H8O4	120.041	119.033	5.3	1.677	-	[M-H]-	0	0	0	0	0	0	0	0	0	0	0	0	0	0	0	0	0	0
		26	2.38	Carbohydrate	Galactose lactate derivate	C9H16O9	268.079	267.072	3.9	0.651	-	[M-H]-	12846	12790	13212	12078	11870	11980	27378	26266	25790	27018	28662	28084	32394	34222	34390	35396	31906	33222
		27	4.65	Cofactor	NAD⁺	C21H27N7O14P2	663.107	662.099	40.4	2.385	944.8	[M-H]-	3702	3822	3670	3760	4066	3954	0	0	0	0	0	0	0	0	0	0	0	0
		28	15.47	Lipid	TAG 16:0/18:1/2:0	C39H72O6	636.532	635.525	21.9	0.438	-	[M-H]-	0	0	0	0	0	0	0	0	0	0	0	0	0	0	0	0	0	0
		29	15.27	Lipid	10-OAHSA	C36H68O4	564.511	563.504	28.75	0.4685	-	[M-H]-	0	0	0	0	0	0	0	0	0	0	0	0	0	0	0	0	0	0
		30	15.04	Lipid	FAHFA 34:0	C34H66O4	538.496	537.489	14.9	0.293	-	[M-H]-	0	0	0	0	0	0	0	0	0	0	0	0	0	0	0	0	0	0
		31	13.5	Lipid	FAHFA 36:3	C36H64O4	560.479	559.472	11.7	1.263	-	[M-H]-	0	0	0	0	0	0	0	0	0	0	0	0	0	0	0	0	1214	1176
		32	13.51	Lipid	Linoleic acid	C18H32O2	280.239	279.232	3.8	0.95	-	[M-H]-	0	23332	22522	0	22338	21430	0	26530	22658	0	21184	27150	0	25374	26436	0	26074	24744
		33	15.245	Lipid	Oleic acid	C18H34O2	282.255	281.248	8.95	0.4785	799.3	[M-H]-	0	4396	4728	0	4190	3988	0	9234	8040	0	8530	8912	0	5642	4604	0	4880	4966
		34	14.74	Lipid	Palmitic acid	C16H32O2	256.24	255.232	3.6	0.542	-	[M-H]-	1460	3392	4430	1436	3340	3290	1578	3570	4772	1704	10082	3962	1812	2786	2420	1830	2678	2682
		35	15.75	Lipid	Linolenic acid	C18H30O2	278.224	277.217	14.8	0.324	-	[M-H]-	2246	1776	1982	2138	2394	1916	1844	1556	1722	1718	2382	1826	2704	2638	3108	2600	2432	2772
		36	14.69	Lipid	15,16-Dihydroxydotriacontanoic acid	C32H64O4	512.48	511.472	16.9	0.713	-	[M-H]-	0	0	0	0	0	0	0	0	0	0	0	0	0	0	0	0	0	0
		37	13.6	Lipid	Dihydroxystearic acid	C18H36O4	316.261	315.254	4.6	0.226	-	[M-H]-	29064	25776	22294	27496	24240	24050	8488	8172	6906	7692	7430	6576	26934	22540	20916	25308	20500	21216
		38	15.81	Lipid	LPC 18:2	C26H50NO7P	565.337	564.33	9.7	0.5763	-	[M+HCOO]-	72198	73922	68204	80020	82278	80954	41064	33848	33110	32972	35738	30748	76444	77446	77674	79090	81306	82356
		39	15.12	Lipid	LysoPE(0:0/18:2(9Z,12Z))	C23H44NO7P	477.286	476.279	6.4	0.259	-	[M-H]-	26112	25708	22500	29834	29270	27194	19252	15802	14942	16236	15128	14752	26522	25704	26990	27962	26866	29648
		40	14.8	Lipid	FA 18:1;O (mid-OH)	C18H34O3	298.251	297.243	4.6	0.256	-	[M-H]-	0	0	0	0	0	0	2592	2150	2252	2248	2180	2344	0	0	0	0	0	0
		41	11.07	Lipid	DHP-oxo-C9 acid	C12H22O6	262.142	261.134	13.8	0.003	901.2	[M-H]-	0	0	0	0	0	0	0	0	0	0	0	0	0	0	0	0	0	0
		42	14.07	Lipid	FA 18:1;O (ω-OH)	C18H34O3	298.25	297.243	16.4	0.463	-	[M-H]-	169504	151640	138492	165922	157670	156848	0	0	0	0	0	0	3718	3454	3716	3850	3460	3792
		43	13.39	Lipid	FA 18:1+2O	C18H34O4	314.245	313.238	16.7	0.231	-	[M-H]-	18216	15834	13258	18710	15522	15748	9100	7342	7884	8414	7972	8478	16790	15582	16754	17230	16156	15182
		44	12.75	Lipid	FA 18:1+3O	C18H34O5	330.24	329.233	17.2	0.026	-	[M-H]-, [M+Cl]-	3968	3958	3730	3900	3910	4022	3560	3928	3970	3576	4262	3448	4428	4358	4244	4152	3674	4366
		45	13.29	Lipid	FA 18:2+2O	C18H32O4	312.23	311.222	15.8	0.54	-	[M-H]-	2628	2186	1762	2330	2198	2174	1648	1674	1270	1690	1388	1540	2050	1716	2014	2666	1718	2192
		46	14.46	Lipid	Phospholipid	C34H61O14P	724.387	723.379	10.9	6.787	-	[M-H]-	7956	7492	6880	9036	9112	7998	9944	8348	7736	7352	7690	7254	8556	0	0	9256	9174	9548
		47	1.65	Nucleoside	Uridine	C9H12N2O6	244.069	243.061	10.2	0.866	-	[M-H]-	0	0	0	0	0	0	3254	3186	3408	2880	3178	3116	3310	3244	3386	2916	3066	3146
		48	3.18	Nucleotide	Adenosine 5'-monophosphate	C10H14N5O7P	347.063	346.056	12.9	0.228	947.6	[M-H]-	6528	6168	5936	6510	6748	6756	0	0	0	0	0	0	1258	1252	1430	1006	1062	0
		49	6.44	Nucleotide	Guanosine 5'-monophosphate	C10H14N5O8P	363.058	362.05	17	0.478	992.7	[M-H]-	3798	3298	2870	0	2954	3076	0	0	0	0	0	0	0	0	0	0	0	0
		50	10.11	Nucleotide	Guanosine cyclic monophosphate	C10H12N5O7P	345.048	344.041	5.6	0.391	710.3	[M-H]-	1120	1144	0	0	0	1036	0	0	0	0	0	0	0	0	0	0	0	0
		51	12.64	Nucleotide	Inosine-5-monophosphate	C10H13N4O8P	348.047	347.04	9.7	0.2805	977.9	[M-H]-	122444	118104	107344	119606	123132	123020	0	0	0	0	0	0	0	0	0	0	0	0
		52	5.75	Nucleotide	Uridine 5'-monophosphate	C9H13N2O9P	324.038	323.03	14	1.651	977.1	[M-H]-	5538	4844	4680	4878	4906	0	0	0	0	0	0	0	0	0	0	0	0	0
		53	11.53	Organic acid	Azelaic acid	C9H16O4	188.104	187.096	7.7	1.151	994.8	[M-H]-	1730	1482	1586	1664	1780	1506	1384	1512	1648	1340	1556	1688	1940	1680	1774	1706	1742	1976
		54	12.18	Organic acid	Sebacic acid	C10H18O4	202.119	201.112	8	1.293	903.4	[M-H]-	0	0	0	0	0	0	0	0	0	0	0	0	0	0	0	0	0	0
		55	9.48	Organic acid	Suberic acid	C8H14O4	174.088	173.081	6.9	1.275	804.4	[M-H]-	0	0	0	0	0	0	0	0	0	0	0	0	0	0	0	0	0	0
		56	9.95	Organic acid	Indolelactic acid	C11H11NO3	205.073	204.065	8.5	1.153	-	[M-H]-	9924	9846	8120	9502	9762	9736	0	0	0	0	0	0	0	0	0	0	0	0
		57	8.47	Organic acid	2-Hydroxy-4-methylpentanoic acid	C6H12O3	132.077	131.07	4.9	1.59	995.8	[M-H]-	33564	32898	27534	33290	31296	30230	0	0	0	0	0	0	0	0	0	0	0	0
		58	7.71	Organic acid	2-Isopropylmalic acid	C7H12O5	176.067	175.06	9.1	1.329	849.9	[M-H]-	0	0	0	0	0	0	0	0	0	0	0	0	0	0	0	0	0	0
		59	4.07	Organic acid	3-Furoic acid	C5H4O3	112.015	111.007	4.35	1.447	959.2	[M-H]-	4496	4292	4022	4284	4500	4660	4688	4134	4198	3924	4800	4160	6042	5616	6432	5520	5294	4918
		60	16.37	Organic acid	4-methyl-2-oxopentanoic acid	C6H10O3	130.061	129.054	5.1	1.623	-	[M-H]-	0	0	0	0	0	0	1328	0	1340	0	0	0	1570	0	1288	1230	1482	1360
		61	3.9	Organic acid	Citric acid	C6H8O7	192.025	191.018	0.5	1.584	981	[M-H]-	40896	41888	37198	41620	44218	44314	41554	36396	35338	34064	38614	35456	51740	51028	50378	51356	47544	51298
		62	1.34	Organic acid	D-glycero-D-gulo-heptonic acid	C7H14O8	226.068	225.061	11.1	0.884	-	[M-H]-	0	0	0	0	0	0	2480	2750	2184	2668	2532	2284	2240	2650	2598	2520	2490	2970
		63	2.93	Organic acid	Dihydroxy isovaleric acid	C5H10O4	134.054	133.047	8.7	3.7955	854.7	[M-H]-	2242	1100	0	1172	1088	1208	0	0	0	0	0	0	0	0	0	0	0	0
		64	5.59	Organic acid	2-Hydroxyvaleric acid	C5H10O3	118.062	117.054	5.4	1.466	992.7	[M-H]-	15372	15338	15284	14180	17028	14512	0	0	0	0	0	0	0	0	0	0	0	0
		65	2.3	Organic acid	Gluconic acid	C6H12O7	196.057	195.049	0.7	1.627	983.6	[M-H]-	4094	3672	3614	3926	3966	3716	29060	26654	29046	26024	30738	27394	33708	34078	32966	31672	32198	32960
		66	1.835	Organic acid	Lactic acid	C3H6O3	90.0303	89.0229	4.1	1.469	-	[M-H]-, [M-H-H2O]-	456686	453802	435004	456620	476496	479296	20694	21956	19810	8352	7330	25044	6936	6324	0	5694	0	0
		67	2.62	Organic acid	Malic acid	C4H6O5	134.02	133.012	1.1	1.955	894.1	[M-H]-, [M-H-H2O]-	8086	7776	6650	7684	7722	8218	88342	78864	80054	70252	80008	79962	112938	129992	114982	126370	110830	113300
		68	3.86	Organic acid	Malonic acid	C3H4O4	104.009	103.002	5.6	1.478	979	[M-H]-	0	1642	1316	1984	1786	1970	0	0	0	0	0	0	0	0	0	0	0	0
		69	2.95	Organic acid	Mucic acid	C6H10O8	210.036	209.029	10.7	1.078	984.8	[M-H]-	0	1124	0	1090	1108	1000	1174	1014	1250	1122	1214	1040	2118	2186	1794	1936	1722	2114
		70	1.18	Organic acid	Fumarate	C4H2O4	113.991	112.984	13.3	3.989	-	[M-H]-	18462	20016	17942	21702	18346	20446	11374	10204	10094	10756	10614	11614	13180	10668	11430	10208	12000	10580
		71	2.4525	Organic acid	Succinic acid	C4H6O4	118.025	117.018	5.375	1.71725	998.8	[M-H]-	12304	11082	10972	11188	21514	11884	1336	1512	1446	1436	1524	1560	1796	1900	1630	1804	1792	1676
		72	2.3	Organic acid	Threonic acid	C4H8O5	136.035	135.027	7.7	2.491	839.2	[M-H]-	8870	8762	9024	8368	9042	9256	2484	2482	2304	2600	2864	2814	3128	3118	2932	2698	2696	2718
		73	14.31	Oxylipin	12,13-EODE	C18H32O3	296.235	295.228	15.5	0.215	-	[M-H]-	0	6704	0	6470	0	0	5114	4812	4912	5272	5722	4560	9060	9062	9210	10062	8604	8818
		74	13.8	Oxylipin	13-HODE DIMER	C36H64O6	592.47	591.462	16.3	0.661	-	[M-H]-	1336	0	0	1306	1026	1092	0	0	0	0	0	0	0	0	0	0	0	0
		75	13.92	Oxylipin	13-HOTrE	C18H30O3	294.219	293.212	15.4	0.493	-	[M-H]-	0	0	0	0	0	0	0	0	0	0	0	0	0	0	0	0	0	0
		76	13.59	Oxylipin	17-Hydroxylinolenic acid	C18H30O3	294.219	293.212	15	0.523	-	[M-H]-, [M-H-H2O]-	3432	2784	2220	3146	2606	2610	1810	1586	1388	1754	1404	1346	3730	2766	2826	3086	2666	3428
		77	13.79	Oxylipin	9-HODE	C18H32O3	296.235	295.227	14.7	0.648	-	[M-H]-	60492	52470	46986	59344	51458	52030	15386	12422	12916	13386	14104	12228	36554	34536	33774	36532	31582	32128
		78	12.99	Oxylipin	Phytuberin derivate	C17H26O4	294.183	293.176	1.7	0.294	-	[M-H]-	19250	21954	20784	20492	23192	22338	22464	24564	25714	25132	29294	28774	21758	22614	23622	23688	25070	25474
		79	2.26	Phenolic	Dimethoxy-cinnamyl dihexoside	C25H30O12	522.174	521.167	49.6	0.28	-	[M-H]-	2978	3204	3086	3010	3060	3098	0	0	0	0	0	0	0	0	0	0	0	0
		80	7.41	Phenolic	5-O-p-Coumaroylquinic acid	C17H20O9	368.112	367.104	35	0.909	917	[M-H]-	0	0	0	0	0	0	0	0	0	0	0	0	0	0	0	0	0	0
		81	7.74	Phenolic	2-Hydroxyphenylacetic acid	C8H8O3	152.046	151.038	7.9	1.648	997.3	[M-H]-	0	0	0	0	0	0	0	0	0	0	0	0	0	0	0	0	0	0
		82	6.22	Phenolic	3-Hydroxybenzoate	C7H6O3	138.03	137.023	20.3	1.636	997.6	[M-H]-	0	0	0	0	0	0	0	0	0	0	0	0	0	0	0	0	0	0
		83	8.62	Phenolic	p-Coumaric acid	C9H8O3	164.046	163.039	7.4	1.558	-	[M-H]-	0	0	0	0	0	0	0	0	0	0	0	0	0	0	0	0	0	0
		84	7.04	Phenolic	Caffeic acid	C9H8O4	180.041	179.034	7.8	1.105	994.2	[M-H]-	0	0	0	0	0	0	0	0	0	0	0	0	0	0	0	0	0	0
		85	9.18	Phenolic	Ferulic Acid	C10H10O4	194.057	193.049	8.8	1.187	997.7	[M-H]-	0	0	0	0	0	0	0	0	0	0	0	0	0	0	0	0	0	0
		86	9.66	Phenolic	Benzoyloxypropyl-gluconic acid	C16H20O10	372.107	371.099	28.5333	1.02967	837.3	[M-H]-	2100	2204	2206	2004	1926	2048	1608	1426	1614	1316	1544	1366	2042	2002	2042	1888	1950	2040
		87	12.54	Phenolic	Avenanthramide	C16H13NO5	299.079	298.072	3.3	0.035	-	[M-H]-	5724	5304	4850	5068	5244	4530	5796	5398	5448	5212	6234	5600	7756	7974	7674	7958	7066	8424
		88	12.59	Phenolic	Avenanthramide B	C17H15NO6	329.09	328.083	0.8	0.2	-	[M-H]-	6388	6704	5574	6900	6338	6674	8214	8068	8252	7418	8218	7960	12354	11684	11828	11328	11852	12318
		89	12.29	Phenolic	Avenanthramide K	C16H13NO6	315.074	314.067	3.8	0.16	-	[M-H]-	3762	3632	3426	2926	3270	3066	2902	2964	3122	3658	3324	2972	4626	4070	4092	4562	3918	3998
		90	5.66	Phenolic	3,4-Dihydroxybenzaldehyde	C7H6O3	138.03	137.023	10	1.662	-	[M-H]-	0	0	0	0	0	0	0	0	0	0	0	0	0	0	0	0	0	0
		91	6.84	Phenolic	3-Hydroxybenzaldehyde	C7H6O2	122.035	121.028	3.9	1.413	931.9	[M-H]-	0	0	0	0	0	0	2728	2540	2298	2206	2656	2524	2868	3366	3178	2892	2994	3110
		92	9.93	Phenolic	1,2-Diferuloylgentiobiose	C32H38O17	740.217	739.21	16.3	0.6648	-	[M-H]-	2760	2926	2494	3124	2598	2562	2432	0	2118	2268	2570	2156	3130	3102	0	0	0	2928
		93	1.18	Phenolic	p-Coumaroyl glycolic acid derivate	C11H10O5	181.979	180.972	N/A	N/A	N/A	[M-H]-	2680	2224	2212	2194	2360	2126	1384	1630	1394	1318	0	1538	1510	0	1360	1368	1314	0
		94	2.36	Phenolic compound	4'-Methoxyflavone	C16H12O3	252.083	251.076	42.9	4.704	795.8	[M-H]-	22598	23272	21570	20882	21810	21592	0	0	0	0	0	0	0	0	0	0	0	0
		95	9.78	Phenolic compound	Isovitexin 2''-O-arabinoside	C26H28O14	564.149	563.142	47.7	1.035	956.1	[M-H]-	0	0	0	0	0	0	0	0	0	0	0	0	0	0	0	0	0	0
		96	1.45	Phenolic compound	p-Coumaryl glucoside	C15H20O7	312.114	311.107	49.6	6.677	751.3	[M-H]-	0	0	0	0	0	0	0	0	0	0	1032	0	0	0	0	0	0	1022
		97	5.77	Phenolic compound	3-(4-Hydroxyphenyl)lactic acid	C9H10O4	182.057	181.049	7.4	1.379	860.6	[M-H]-	8326	7720	7324	8230	7684	7912	0	0	0	0	0	0	0	0	0	0	0	0
		98	9.73	Phenolic compound	3-Phenyllactic acid	C9H10O3	166.061	165.054	6.2	1.58	910.7	[M-H]-, [M-H-H2O]-	15250	14334	12018	15282	14404	13814	0	0	0	0	0	0	0	0	0	0	0	0
		99	3.6	Phosphate	Orthophosphate	H3O4P	97.9746	96.9673	5	2.301	998.1	[M-H]-	0	34626	31222	28824	29186	0	0	17546	0	13656	19430	14764	24828	24582	0	23000	22790	0
		100	4.24	Phosphate	Phenyl phosphate	C6H7O4P	174.015	173.008	20.6	6.785	982.6	[M-H]-	1244	1160	0	1006	1228	1084	1308	1172	0	1044	1216	1178	1588	1734	1586	1434	1364	1382
		101	3.82	Phosphate	L-Glycerol-2-phosphate	C3H9O6P	172.012	171.005	14.2	1.714	999.1	[M-H]-	1430	1502	0	1334	1402	0	0	0	0	0	0	0	0	0	0	0	0	0
		102	1.35	Polyol	D-Mannitol	C6H14O6	228.083	227.076	11.16	12.2692	-	[M-H+HCOOH]-	0	0	0	0	0	0	0	0	0	0	0	0	0	0	0	0	0	0
		103	3.27	Polyol	Meglutol	C6H10O5	162.051	161.044	7.1	1.736	778.2	[M-H]-	0	0	0	0	0	0	0	0	0	0	0	0	0	0	0	0	0	0
		104	1.37	Polyol	Sorbitol	C6H14O6	182.077	181.07	0.1	1.745	959.8	[M-H]-	0	0	0	0	0	0	2576	2980	3196	3314	3034	3040	3550	3806	3316	3544	3050	3142
		105	1.37	Polyol	Xylitol	C5H12O5	152.067	151.059	6.9	1.767	981	[M-H]-	0	0	0	0	0	0	1072	1210	1098	1214	1424	1126	1376	1124	1162	1162	1204	1028
		106	6.83	Vitamin	Nicotinate	C6H5NO2	123.038	122.031	8.6	6.007	799.3	[M-H]-	0	0	0	0	0	0	0	0	0	0	0	0	0	0	0	0	0	0
		107	5.58	Vitamin	4-Pyridoxic acid	C8H9NO4	183.053	182.046	7.8	0.221	781.4	[M-H]-	1086	0	0	0	0	0	0	0	0	0	0	0	0	0	0	0	0	0
