# Supplementary material
Source: Royal Society of Chemistry journal article supplement (doi:10.1039/d6fo00493h)
Supplement: d6fo00493h2.pdf [file d6fo00493h2.pdf]

**Table S.1** Target polyphenols. CAS number, molecular mass and retention time.

| Polyphenols                   | CAS         | Molecular mass<br>(g·mol <sup>-1</sup> ) | Retention time<br>(min) | Precursor ion<br>(m/z) |
|-------------------------------|-------------|------------------------------------------|-------------------------|------------------------|
| Gallic acid                   | 149-91-7    | 170.1                                    | 2.35                    | 169.0                  |
| 2,4,6-trihydroxybenzoic acid  | 71989-93-0  | 188.1                                    | 3.37                    | 168.9                  |
| Gallocatechin                 | 970-73-0    | 306.3                                    | 3.80                    | 305.0                  |
| 3,4-dihydroxybenzoic acid     | 99-50-3     | 154.1                                    | 3.88                    | 152.9                  |
| 2,4-dihydroxybenzoic acid     | 89-86-1     | 154.1                                    | 4.41                    | 153.0                  |
| 2,5-dihydroxybenzoic acid     | 490-79-9    | 154.1                                    | 4.44                    | 153.0                  |
| Caftaric acid                 | 67879-58-7  | 312.2                                    | 4.48                    | 310.9                  |
| 2,5-dihydroxybenzaldehyde     | 1194-98-5   | 138.1                                    | 4.63                    | 136.9                  |
| 3,4-dihydroxybenzaldehyde     | 139-85-5    | 138.1                                    | 4.64                    | 136.9                  |
| 3-hydroxybenzoic acid         | 99-06-9     | 138.1                                    | 5.15                    | 137.0                  |
| 4-hydroxybenzoic acid         | 99-96-7     | 138.1                                    | 5.18                    | 137.0                  |
| Procyanidin B1                | 20315-25-7  | 578.5                                    | 5.30                    | 577.0                  |
| Catechin                      | 18829-70-4  | 290.3                                    | 5.34                    | 289.0                  |
| 2,6-dihydroxybenzoic acid     | 303-07-1    | 154.1                                    | 5.54                    | 153.0                  |
| 3,5-dihydroxybenzoic acid     | 99-10-5     | 154.1                                    | 5.54                    | 153.0                  |
| 3-hydroxybenzaldehyde         | 100-83-4    | 122.1                                    | 5.67                    | 121.0                  |
| 4-hydroxybenzaldehyde         | 123-08-0    | 122.1                                    | 5.67                    | 121.0                  |
| 3,4-dimethoxybenzoic acid     | 93-07-2     | 182.0                                    | 6.03                    | 182.9                  |
| Procyanidin B2                | 29106-49-8  | 578.5                                    | 6.10                    | 577.0                  |
| Chlorogenic acid              | 327-97-9    | 354.3                                    | 6.12                    | 353.0                  |
| Ampelopsin                    | 27200-12-0  | 320.25                                   | 6.20                    | 319.0                  |
| Caffeic acid                  | 331-39-5    | 180.2                                    | 6.50                    | 178.8                  |
| Procyanidin C1                | 37064-30-5  | 866.8                                    | 6.52                    | 577.0                  |
| Epicatechin                   | 35323-91-2  | 290.3                                    | 6.56                    | 289.0                  |
| Epigallocatechin gallate      | 989-51-5    | 458.4                                    | 6.79                    | 457.1                  |
| Procyanidin A1                | 12798-56-0  | 576.5                                    | 6.80                    | 577.0                  |
| Gallocatechin gallate         | 84650-60-2  | 458.4                                    | 7.29                    | 457.1                  |
| Procyanidin A2                | 41743-41-3  | 576.5                                    | 7.32                    | 577.0                  |
| Orientine                     | 28608-75-5  | 448.4                                    | 7.38                    | 477.1                  |
| 7-hydroxycoumarin             | 93-35-6     | 162.1                                    | 7.80                    | 162.9                  |
| 4-hydroxycinnamic acid        | 501-98-4    | 164.2                                    | 7.89                    | 163.0                  |
| Epicatechin gallate           | 1257-08-5   | 442.4                                    | 7.92                    | 441.1                  |
| Polidatin                     | 27208-80-6  | 390.4                                    | 7.98                    | 389.1                  |
| Taxifolin                     | 480-18-2    | 304.25                                   | 8.06                    | 303.0                  |
| Catechin gallate              | 130405-40-2 | 442.3                                    | 8.12                    | 441.1                  |
| 3,4-dimethoxybenzaldehyde     | 120-14-9    | 166.2                                    | 8.33                    | 167.0                  |
| Trans-ferulic acid            | 537-98-4    | 194.2                                    | 8.92                    | 192.8                  |
| 4-methoxybenzaldehyde         | 123-11-5    | 136.1                                    | 9.11                    | 136.9                  |
| Resveratrol                   | 501-36-0    | 228.07                                   | 9.31                    | 227.1                  |
| Robinetin                     | 490-31-3    | 302.23                                   | 9.50                    | 301.2                  |
| Quercetin-3-glucuronide       | 22688-79-5  | 478.4                                    | 9.54                    | 479.0                  |
| Quercetin-3-rutinoside        | 153-18-4    | 610.5                                    | 9.72                    | 609.1                  |
| Quercetin-3-glucoside         | 482-35-9    | 463.4                                    | 9.75                    | 465.0                  |
| Myricetin                     | 529-44-2    | 318.2                                    | 10.09                   | 319.0                  |
| Ellagic acid                  | 476-66-4    | 302.19                                   | 10.21                   | 301.0                  |
| Rosmarinic acid               | 20283-92-5  | 360.3                                    | 10.37                   | 359.0                  |
| 3,4,5-trimethoxycinnamic acid | 90-50-6     | 238.2                                    | 11.13                   | 239.0                  |
| Astragalin                    | 480-10-4    | 448.4                                    | 11.16                   | 447.0                  |
| 3,5-dimethoxybenzaldehyde     | 7311-34-4   | 166.2                                    | 11.26                   | 167.1                  |
| Fisetin                       | 528-48-3    | 286.2                                    | 11.50                   | 285.0                  |
| Daidzein                      | 486-66-8    | 254.2                                    | 11.53                   | 253.0                  |
| Epsilon-viniferin             | 62218-08-0  | 454.5                                    | 11.82                   | 455.1                  |
| Quercetin                     | 117-39-5    | 302.2                                    | 11.83                   | 303.0                  |
| Naringenin                    | 67604-48-2  | 272.2                                    | 11.89                   | 272.0                  |
| Luteolin                      | 491-70-3    | 286.2                                    | 12.17                   | 285.0                  |
| Kaempferol                    | 520-18-3    | 286.2                                    | 12.35                   | 285.0                  |
| Isorhamnetin                  | 480-19-3    | 316.3                                    | 12.52                   | 317.0                  |
| Diosmetin                     | 520-34-3    | 300.26                                   | 12.64                   | 299.0                  |
| Apigenin                      | 520-36-5    | 270.2                                    | 12.63                   | 269.0                  |
| Chrysin                       | 480-40-0    | 254.2                                    | 13.24                   | 253.1                  |

## Supplementary Section S1. Metabolomic Identification: Beyond Tentative Approaches

After isolating the marker analytes for each group, we proceed to identify them using an initial metabolomic approach. Using analytical databases and spectral libraries, provisional names are assigned to 107 compounds, which will be refined later to achieve a complete characterization. This screening is performed using a rigorous computational algorithm that considers the analyte's location in the time-mass-intensity plane, the exact mass ( $\Delta m/z$ ), and the deviation of the isotopic pattern from its theoretical value, quantified as mSigma by the T-Rex 3D algorithm (MetaboScape®). The maximum acceptable  $\Delta m/z$  values are set at 5 mDa for the compound's mass and 50 mSigma for the isotopic pattern.

To increase the reliability of the characterization, the algorithm's scope is expanded by integrating additional tools that enable compound search, *in silico* fragmentation, and spectral comparison via MS/MS matches. The combination of these strategies provides a comprehensive and reliable identification of the analytes present.

As an example, the identification process for the analyte with  $m/z$  773, detected exclusively in the beverage fermented by *Lactobacillus plantarum*, is shown (Supplementary section S1.1).

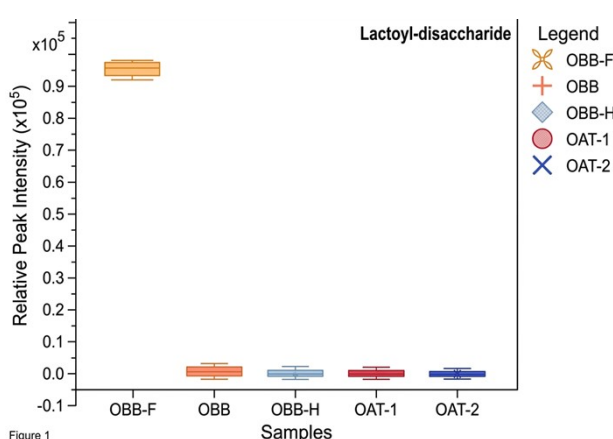

**Supplementary section S1.1.** Relative response of the compound identified as lactoyl-disaccharide in the different samples of base oat beverage (OBB), heat-treated oat beverage (OBB-H), and *L. plantarum*-mediated fermented oat beverage (OBB-F), as well as the oat varieties used, OAT-1 and OAT-2.

The provisional molecular formula proposed by SmartFormula is C<sub>34</sub>H<sub>46</sub>O<sub>20</sub>, based on the screening parameters mSigma < 50 and  $\Delta m/z$  < 5 mDa (Supplementary section S1.2)

| Generate <input checked="" type="checkbox"/> Auto <input style="border: none; padding: 2px 5px;" type="button" value="→ Open in SF3D"/> <input style="border: none; padding: 2px 5px;" type="button" value="⚙️"/> |                                                 |                                                              |                    |          |              |           |                      |        |
|-------------------------------------------------------------------------------------------------------------------------------------------------------------------------------------------------------------------|-------------------------------------------------|--------------------------------------------------------------|--------------------|----------|--------------|-----------|----------------------|--------|
| IDENTIFIED COMPOUNDS                                                                                                                                                                                              |                                                 |                                                              |                    |          |              |           |                      |        |
| #                                                                                                                                                                                                                 | Neutral Formula                                 | Ion Formula                                                  | Ion                | M calc.  | m/z calc.    | m/z meas. | $ \Delta m/z $ [ppm] | mSigma |
| 1                                                                                                                                                                                                                 | C <sub>34</sub> H <sub>46</sub> O <sub>20</sub> | C <sub>34</sub> H <sub>45</sub> O <sub>20</sub> <sup>-</sup> | [M-H] <sup>-</sup> | 774.2582 | 773.25096742 | 773.2506  | 0.3643               | 28.90  |
| 2                                                                                                                                                                                                                 | C <sub>52</sub> H <sub>38</sub> O <sub>7</sub>  | C <sub>52</sub> H <sub>37</sub> O <sub>7</sub> <sup>-</sup>  | [M-H] <sup>-</sup> | 774.2618 | 773.25447711 | 773.2506  | 3.8740               | 173.35 |
| 3                                                                                                                                                                                                                 | C <sub>59</sub> H <sub>34</sub> O <sub>2</sub>  | C <sub>59</sub> H <sub>33</sub> O <sub>2</sub> <sup>-</sup>  | [M-H] <sup>-</sup> | 774.2559 | 773.24860388 | 773.2506  | 1.9992               | 219.51 |

**Supplementary section S1.2.** List of candidates obtained using SmartFormula based on exact mass  $\Delta m/z$  and mSigma.

The identification is supplemented by various spectral databases integrated into MetaboScape®, which suggest possible disaccharide linkages with lactoylated bonds. The potential compound, termed lactoyl-disaccharide, exhibits the characteristic ions  $m/z$  773, 683, 431, 341, 179, and 89. This mass profile matches various carbohydrates and disaccharides, such as isomaltulose (MSBNK-RIKEN\_ReSpect-PS020108) and lactic acid units (MSBNK-Metabolon-MT000003), according to the MassBank database (<https://massbank.eu/MassBank/>).

The structural proposal is validated by *in silico* fragmentation, identifying the characteristic ions of highest intensity. The  $m/z$  773  $\rightarrow$  683 transition corresponds to a neutral loss of 90 Da, attributed to the elimination of a lactic acid residue (C<sub>3</sub>H<sub>6</sub>O<sub>3</sub>). The  $m/z$  683  $\rightarrow$  341 transition suggests the breakdown of the polysaccharide backbone into simpler subunits, while the  $m/z$  431  $\rightarrow$  341 transition could be attributed to a second loss of lactic acid, reinforcing the identification of the lactoyl-disaccharide (**Supplementary section S1.3**).

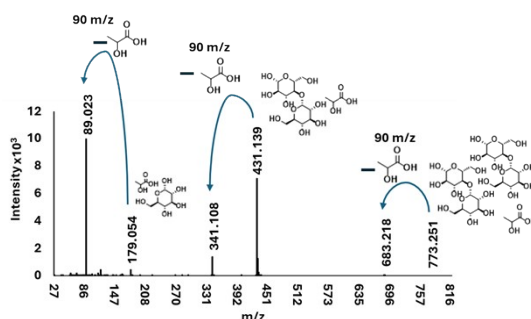

**Supplementary section S1.3.** Mass spectrum and characteristic fragmentation of the lactoyl-disaccharide analyzed using MetFrag.

All analytes identified in the several samples are grouped into a single container called a 'Bucket' in MetaboScape®, enabling the comparison of mass spectra across all samples. Comparison using MS/MS Bucket Matches reveals a high correlation ( $r > 0.9$ ) between the analyte under study and various carbohydrates, including sucrose, lactosylated derivatives and hydroxylated conjugates (**Supplementary section S2.4**).

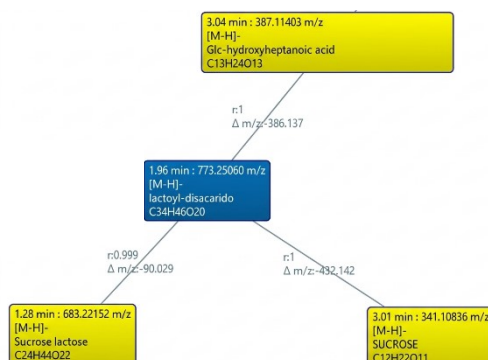

**Supplementary section S1.4.** Spectral correlation using MS/MS bucket matches for the  $m/z$  773 ion, provisionally identified as lactoyl-disaccharide.

The topographic map illustrates the intensity of the compounds using dot size, as well as retention times and mass-to-charge ratios ( $m/z$ ). A specific region containing carbohydrates such as sucrose, trehalose, and lactoylated and hydroxylated derivatives can be observed, which supports the proposed identification of lactoyl-disaccharide (Supplementary section S1.5).

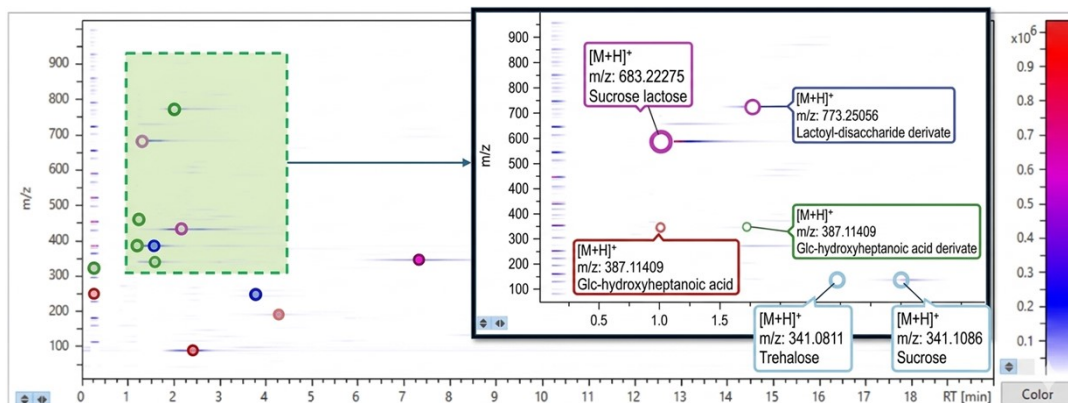

**Supplementary section S1.5.** Topographic map of the  $m/z$  773 ion and comparison with other carbohydrates present in the sample.

The combination of identification tools allows the analytes to be robustly narrowed down to a basic structure. However, the existence of possible isomers and variations in glycosylation contributes to the complexity of achieving an unambiguous identification. For this reason, the designation 'lactoyl-disaccharide' is assigned as a general name when the structure is consistent with more than one molecular distribution, and the designation 'derivative' is used when the identification only allows the analyte to be classified as part of a family of compounds or as a derivative of a specific compound.

## Supplementary section S2. Statistical study parameters via Metaboanalyst 6.0

All data were filtered using the relative standard deviation  $RSD > 25\%$  and normalised by summation. The separation of the data corresponding to the oat-based, heat-treated and fermented beverages, was carried out using both principal component analysis (PCA) and Partial Least Squares - Discriminant Analysis (PLS-DA). For the selection of representative compounds in each group, a one-way ANOVA with false discovery rate (FDR)  $p < 0.05$  was performed. By means of the 5-component evaluation, the values of PC1 and PC2 that provided adequate discrimination and representation of the data were established. The predictive capacity of the model Q2 and the determination coefficient  $R^2$  were determined as model evaluation parameters (**Supplementary section S2.1**).

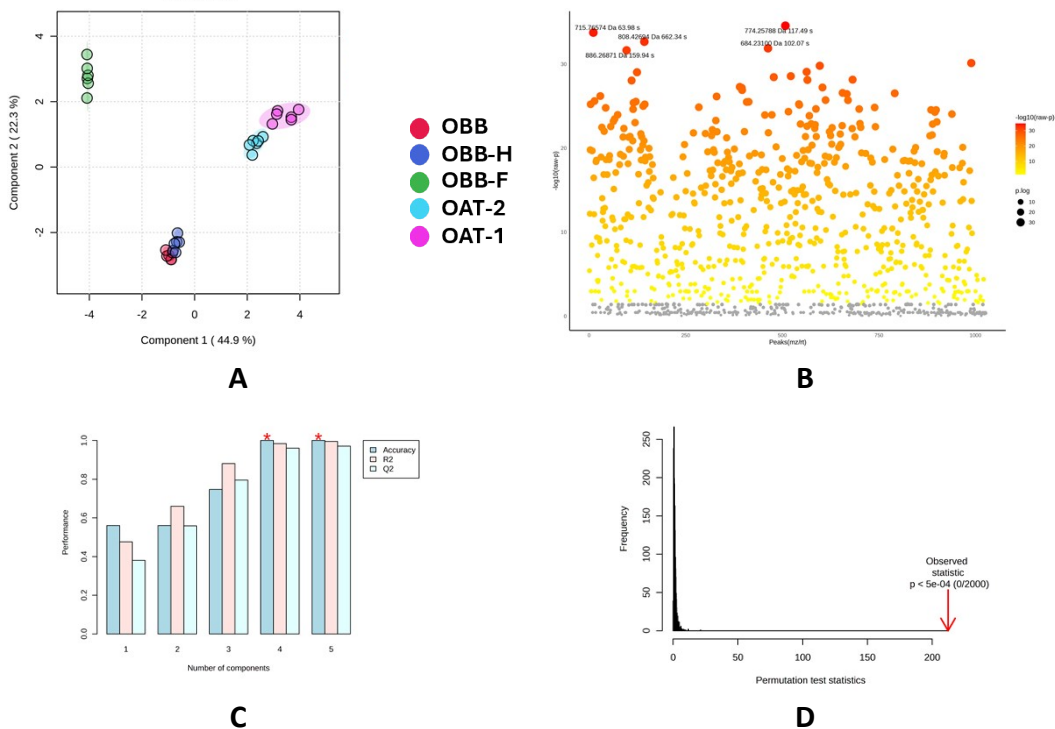

**Supplementary section S2.1.** Metabolomics analysis of the different samples of base oat beverage (OBB), heat-treated oat beverage (OBB-H), and *L. plantarum*-mediated fermented oat beverage (OBB-F), as well as the oat varieties used, OAT-1 and OAT-2. Partial least squares discriminant analysis (PLS-DA) (**S2.1.A**), one-way ANOVA (**S2.1.B**), optimal number of components for PLS-DA classification by cross-validation (**S2.1.C**) and permutation of 2000 iterations (**S2.1.D**).

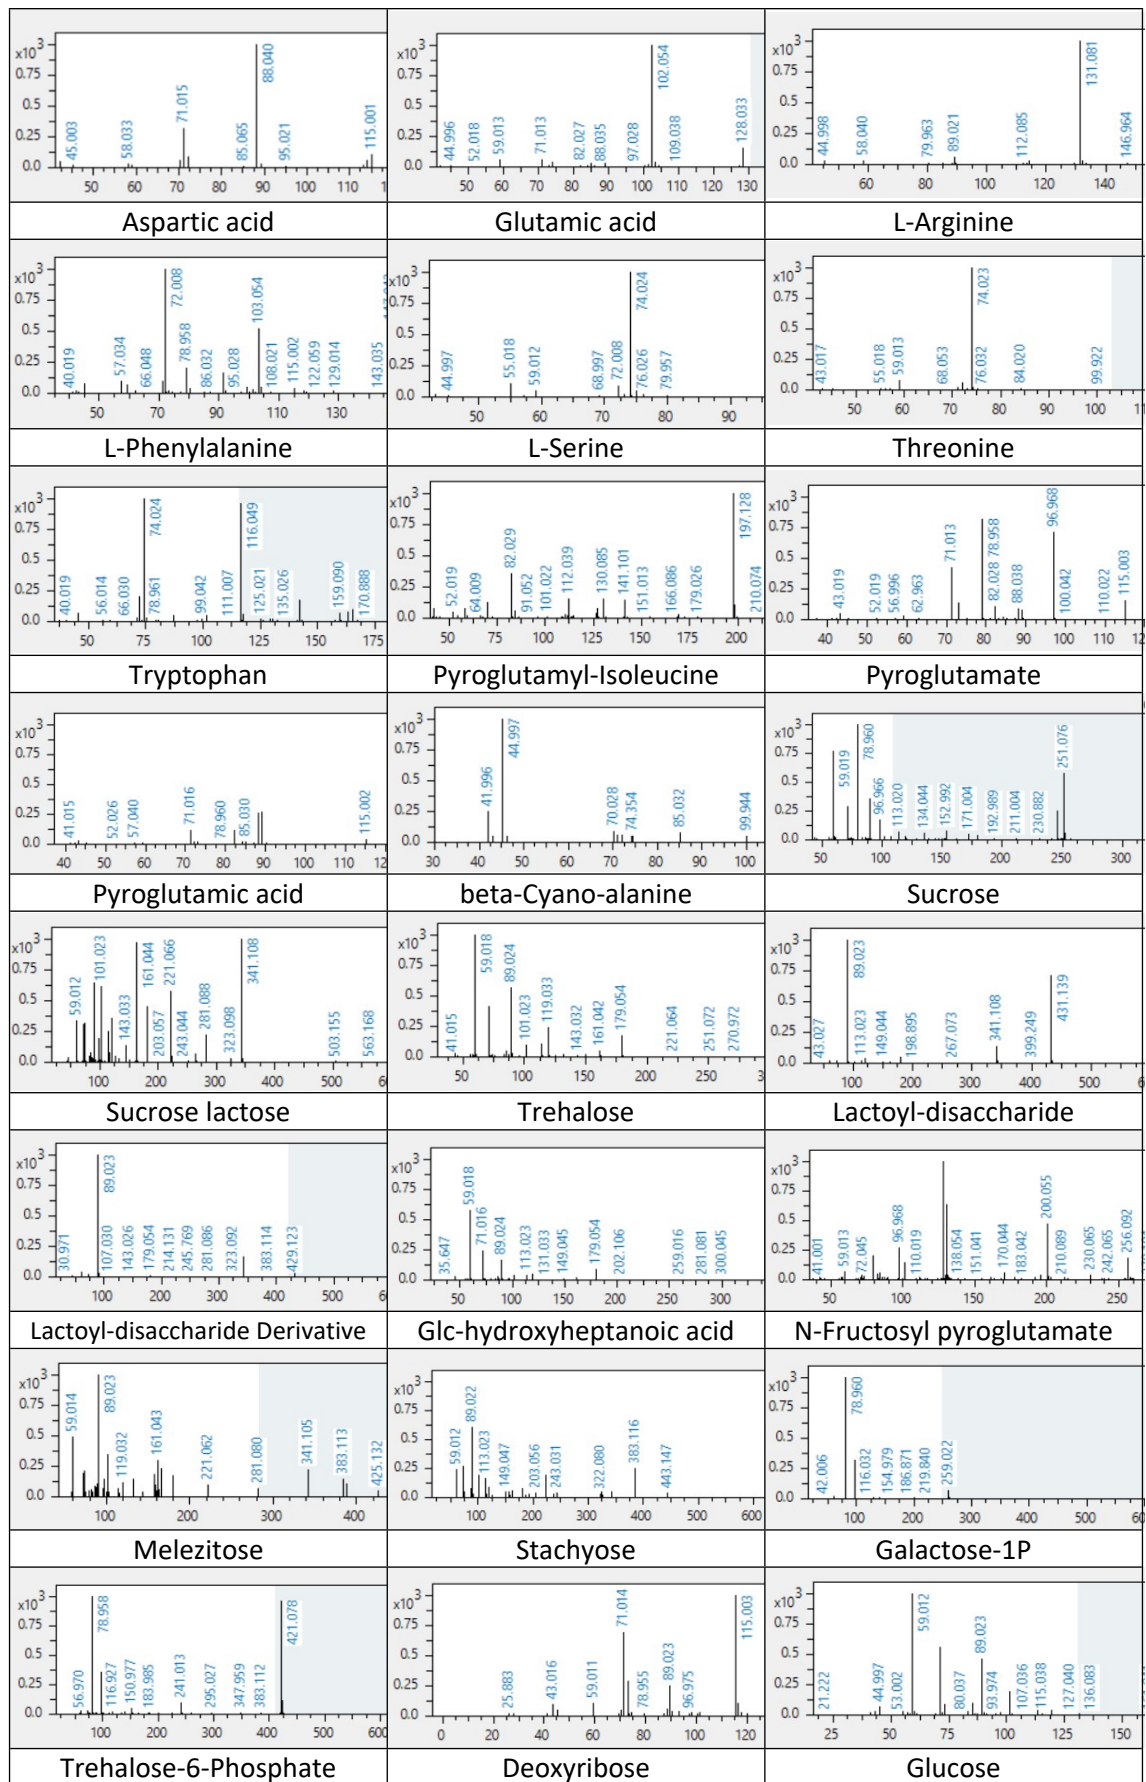

**Figure S1.** Overview of mass spectra from untargeted metabolomic analysis (Continued 1).

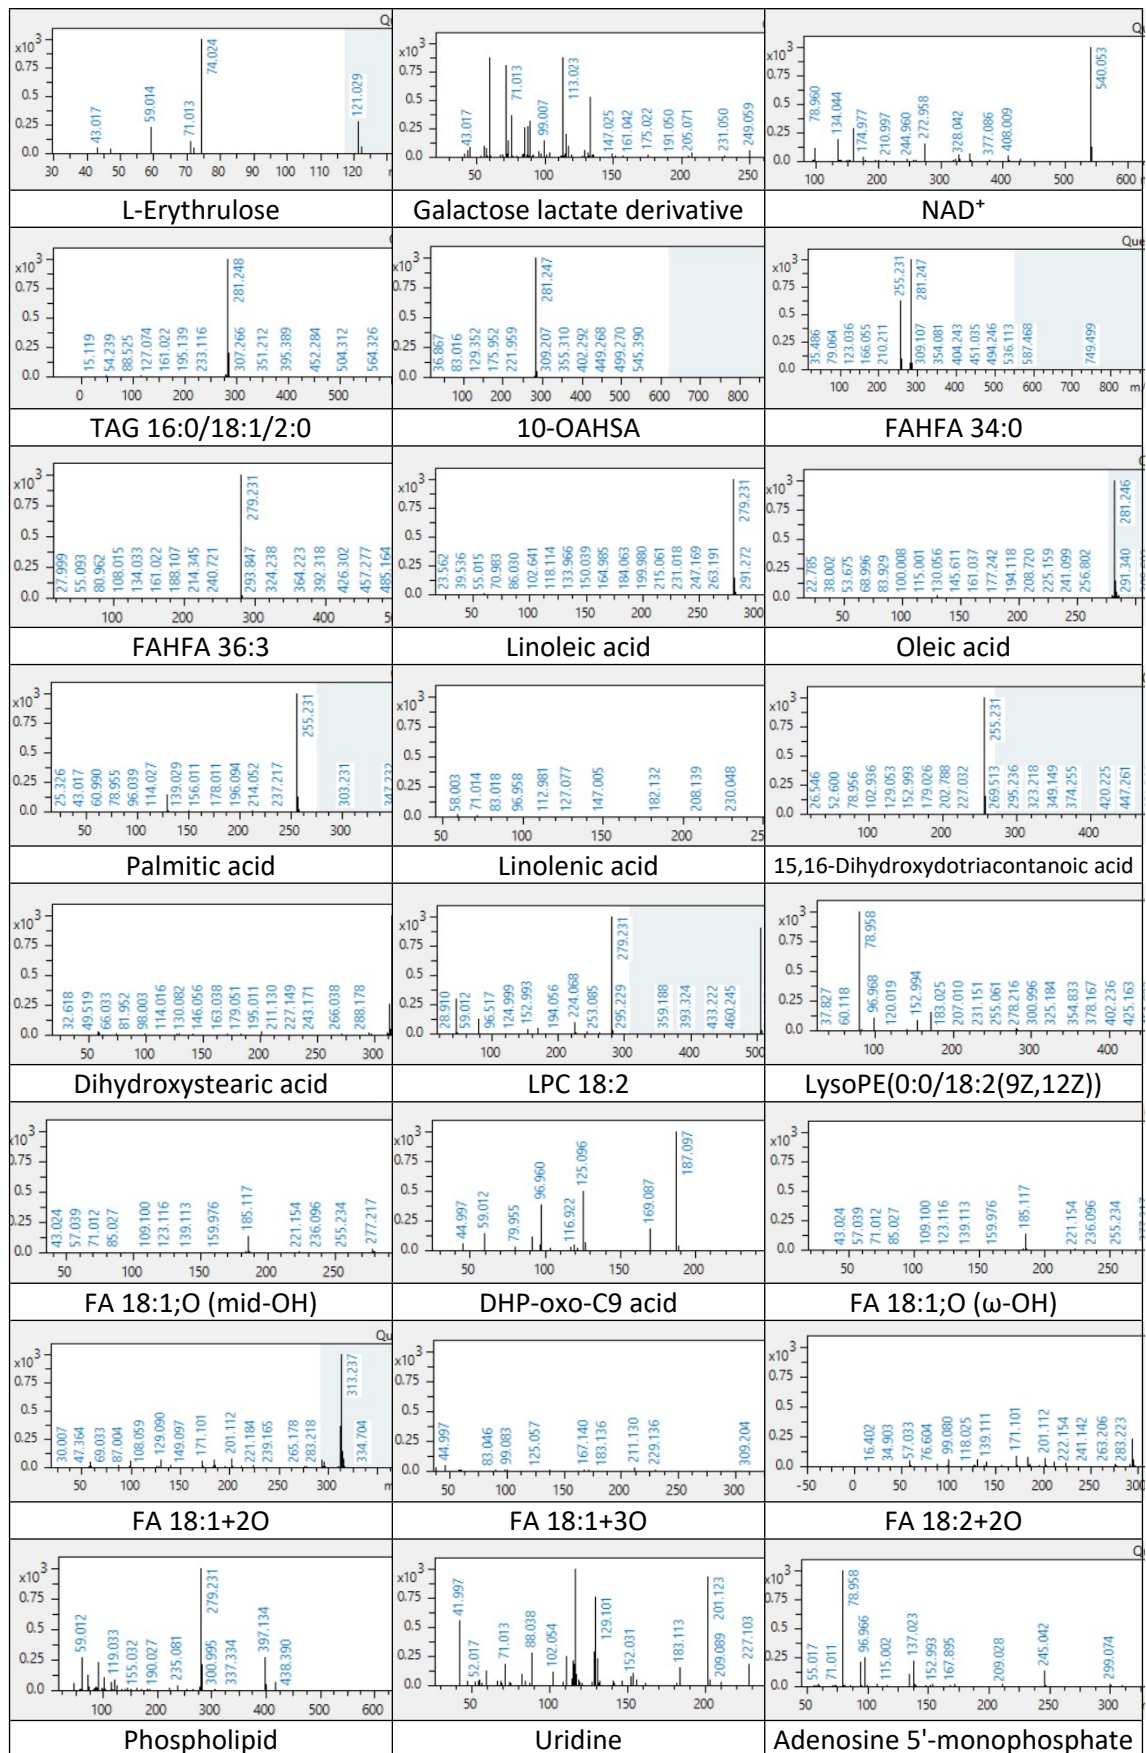

**Figure S1.** Overview of mass spectra from untargeted metabolomic analysis (Continued 2).

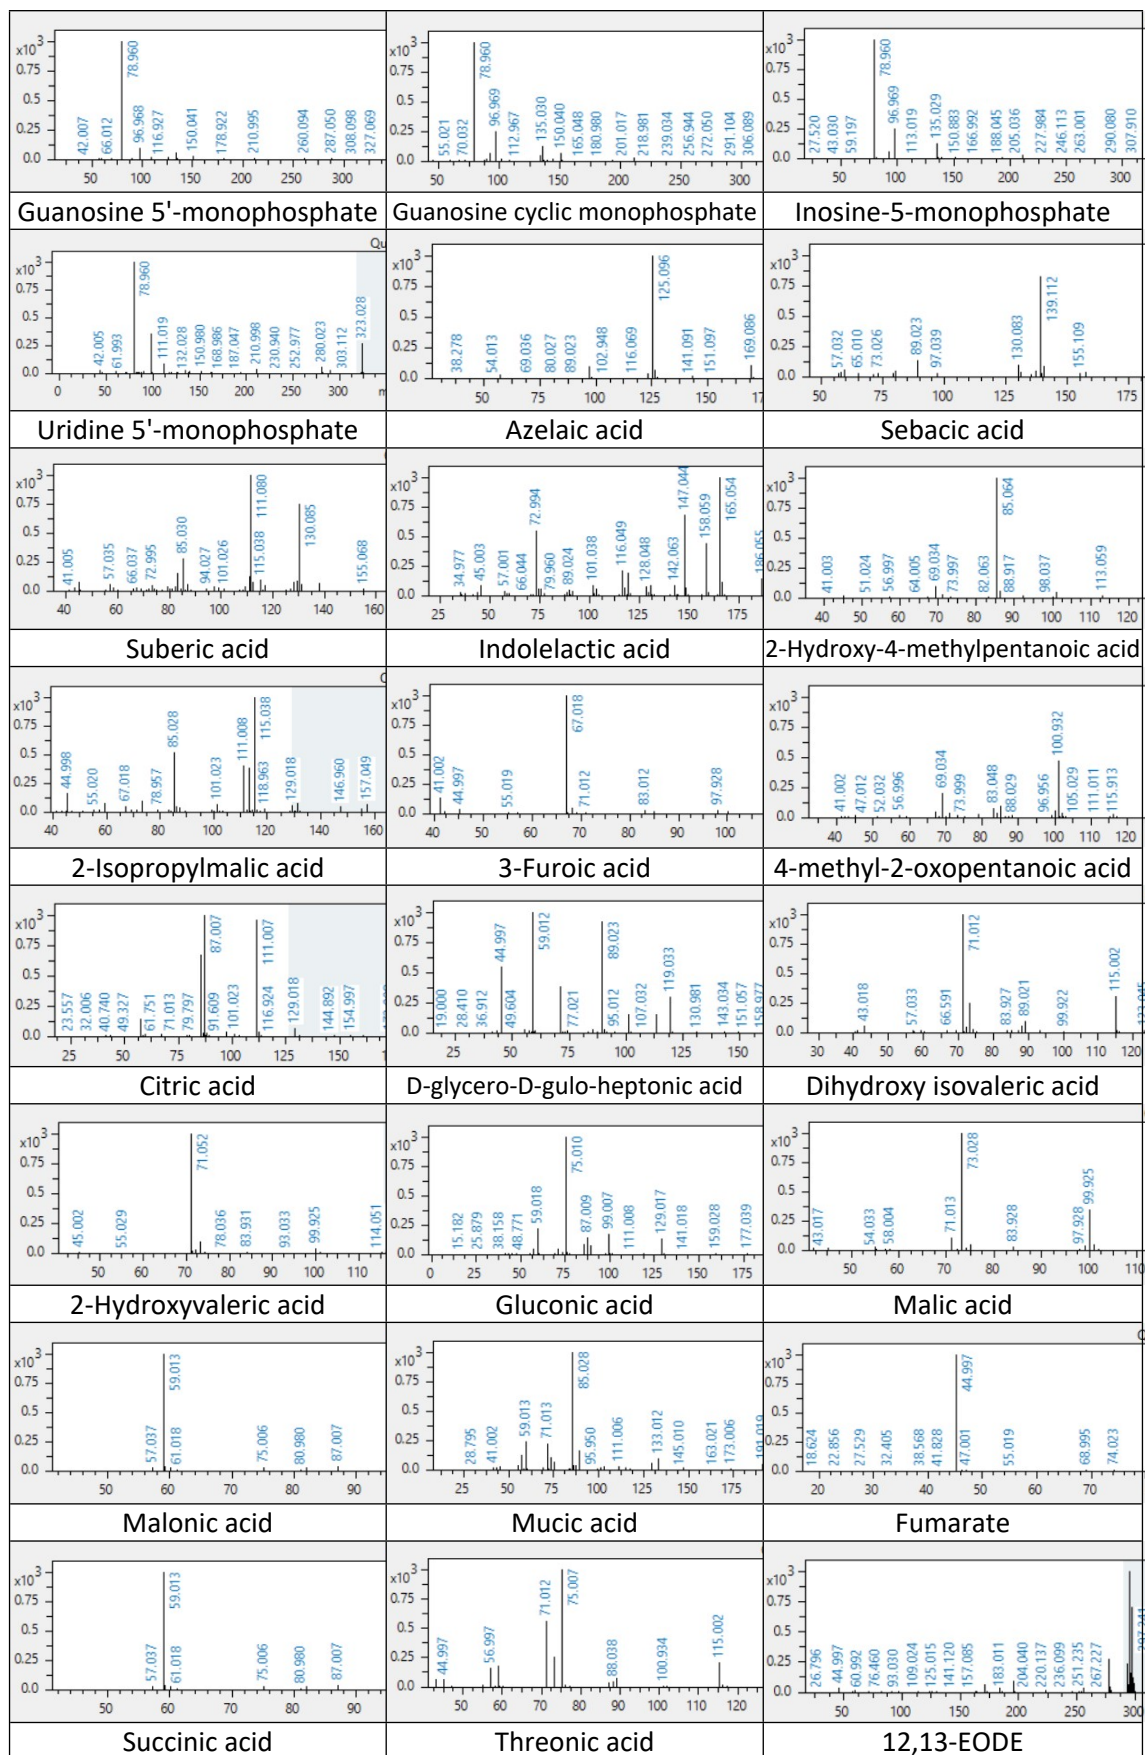

**Figure S1.** Overview of mass spectra from untargeted metabolomic analysis (Continued 3).

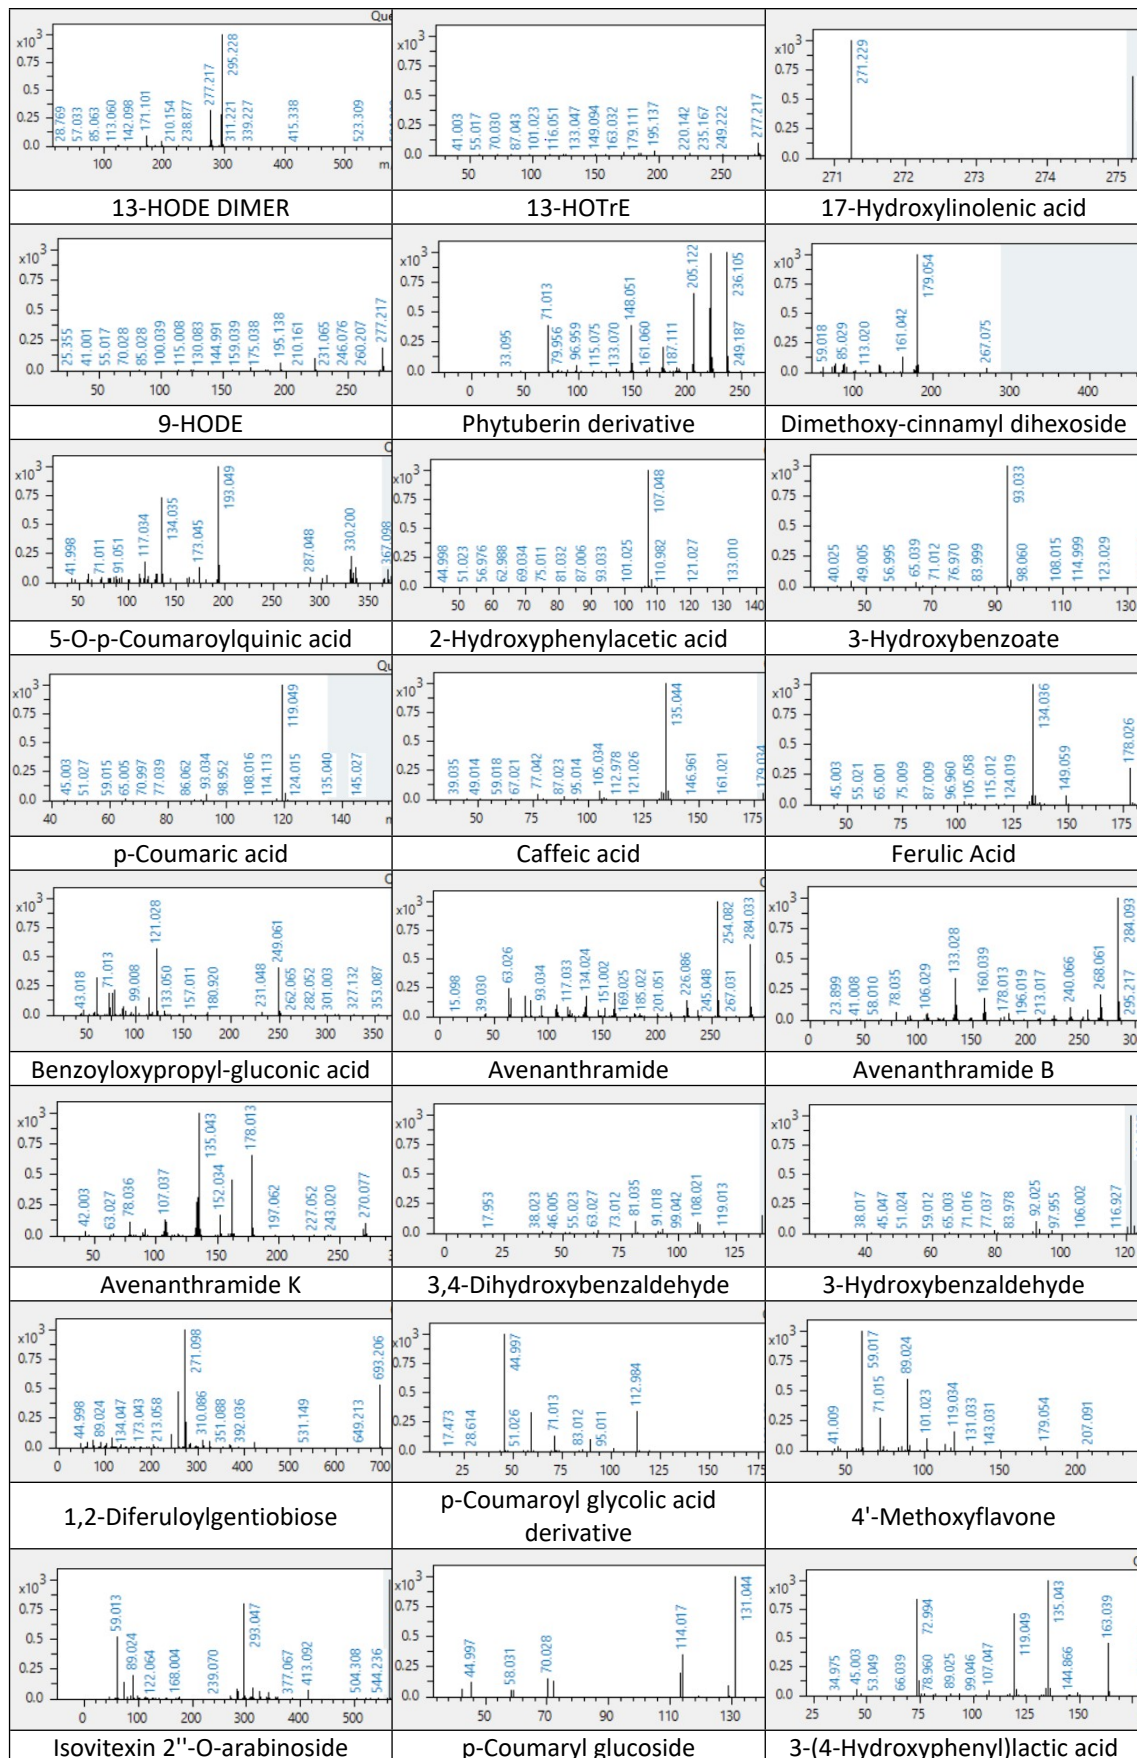

Figure S1. Overview of mass spectra from untargeted metabolomic analysis (Continued 4).

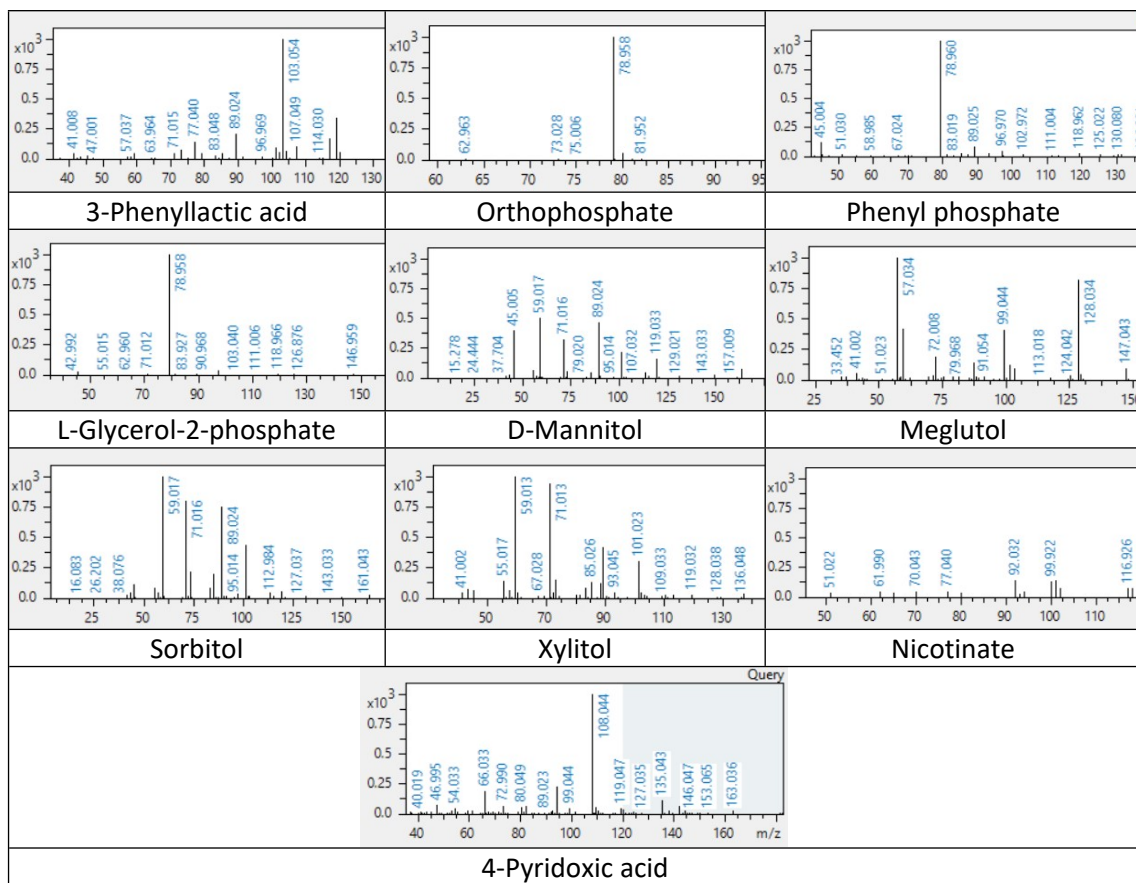

**Figure S1.** Overview of mass spectra from untargeted metabolomic analysis (Continued 5).
